# Supplementary material
Source: publisher figshare collection journal article supplement (https://acs.figshare.com/ndownloader/files/4489981)

Supporting Information to:

**Surface functionality control of nanoporous 1,2-polybutadiene based on atom transfer radical polymerization or click chemistry**

by: *Fengxiao Guo, Katja Jankova, Lars Schulte, Martin E. Vigild, and Sokol Ndoni*

**Figure S1. SAXS 1D profiles of the additional samples.** (a) SAXS 1D profiles of PB precursor, PB-g-PHEMA (wet chem. 0.5 h), and the latter in H<sub>2</sub>O. (b) SAXS 1D profiles of PB precursor, PB-g-PPEGMA (photo chem. 1 h), and the latter in H<sub>2</sub>O. Similar scattering patterns are acquired as in the case of PB-g-PPEGMA (wet chem. 1 h). Scattering intensity is reduced when the modified sample is soaked in H<sub>2</sub>O from the reduced electron density contrast between polymer and H<sub>2</sub>O compared to the contrast between polymer and air. (c) SAXS 1D profiles of PB precursor, PB-*click*-MPEG (click chem.) and PB-*click*-MPEG (click chem.) in H<sub>2</sub>O. There is no enhancement of intensities of scattering peaks at relative  $q$  positions of  $20^{1/2}$ ,  $22^{1/2}$ ,  $24^{1/2}$  and  $26^{1/2}$  for dry PB-*click*-MPEG, one of the possible explanations is that due to low surface density of attached MPEG the pore surface might not be evenly covered by the MPEG layer, as a result a destructive interference can be formed. When PB-*click*-MPEG is soaked in H<sub>2</sub>O, a relatively homogeneous layer of MPEG swelled in H<sub>2</sub>O is formed. The increase of intensities of scattering peaks at relative  $q$  positions of  $20^{1/2}$ ,  $22^{1/2}$ ,  $24^{1/2}$  and  $26^{1/2}$  is observed.

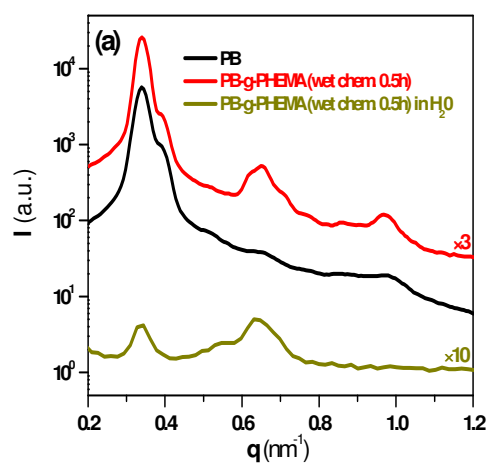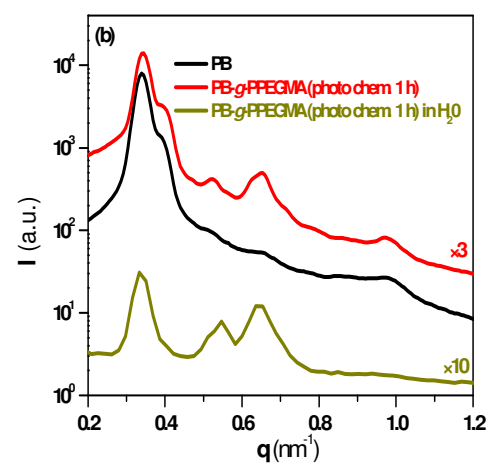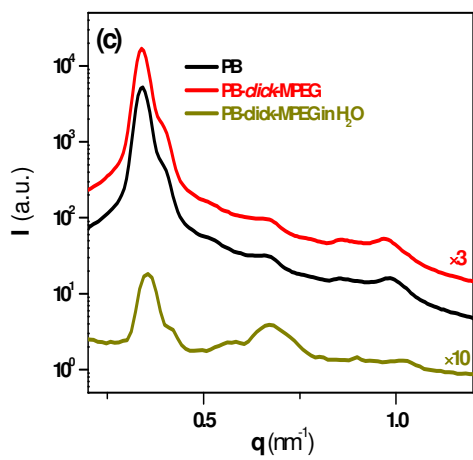

Supplement: Supplementary file 1 [file 4489981]
